# Supplementary material
Source: publisher site journal article supplement (https://www.spandidos-publications.com/2412/downloadSupplementary)

Figure S1. Decreased levels of apoptosis in hippocampus of *Rnd3*<sup>-/-</sup> mouse brain. (A) Western blot analysis revealing a decrease of c-caspase-3 protein levels in the hippocampus of 7-day-old *Rnd3*<sup>-/-</sup> mice compared with wild-type mice. (B) Semi-quantitative analysis of c-caspase-3 protein expression. Protein levels were normalized to GAPDH. \*P<0.05. n=7 in the *Rnd3*<sup>-/-</sup> group; n=8 in the *Rnd3*<sup>+/+</sup> group. c-, cleaved; Rnd3, Rho family GTPase 3.

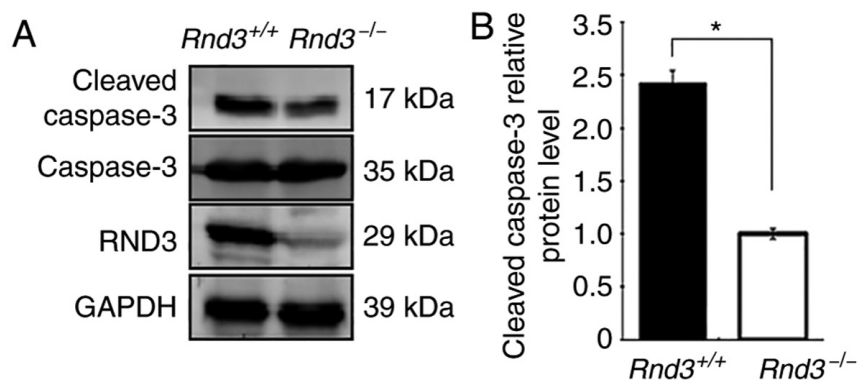

Figure S2. Decreased levels of apoptosis in both neurons and glial cells in the *Rnd3*<sup>-/-</sup> mouse brain. Neun and GFAP were dyed with green fluorescence (left), cleaved caspase 3 was dyed with red fluorescence (middle) and the nucleus was stained blue by DAPI (right). (A) Immunofluorescence analysis demonstrated that the apoptosis of neurons was decreased in *Rnd3*<sup>-/-</sup> mouse brain samples. Neun was used as the marker for neurons. (B) Immunofluorescence results in glial cells followed the same trend as in neurons, and GFAP was used as the marker for glial cells. Scale bar, 50  $\mu$ m. Neun, neuronal nuclei; GFAP, glial fibrillary acidic protein; CC, cerebral cortex; LV, lateral ventricle; *Rnd3*, Rho family GTPase 3.

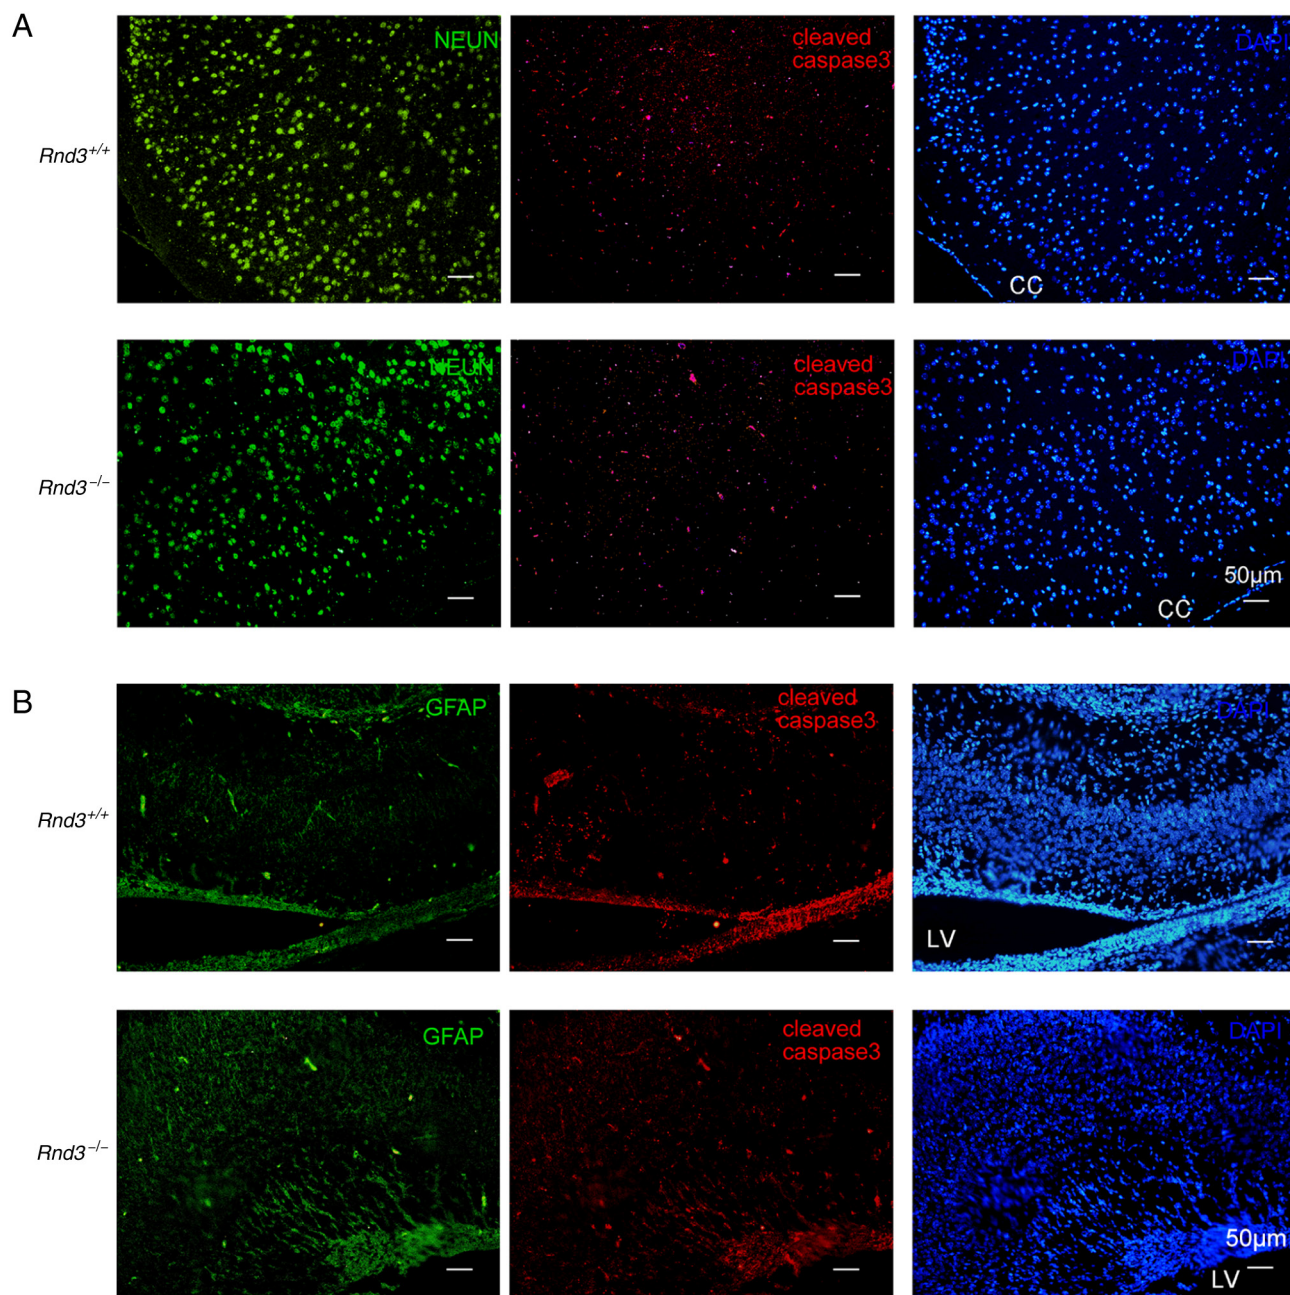

Supplement: Supplementary file 1 [file downloadSupplementary]
